# Supplementary material for: Multifunctional CuxS- and DOX-loaded AuNR@mSiO2platform for combined melanoma therapy with inspired antitumor immunity
Source: Royal Society of Chemistry journal article supplement (doi:10.1039/d1bm00373a), 2021-01-01
Supplement: d1bm00373a1.pdf [file d1bm00373a1.pdf]

## Electronic Supplementary Information (ESI)

### Multifunctional Cu<sub>x</sub>S- and DOX-loaded AuNR@mSiO<sub>2</sub> Platform for Combined Melanoma Therapy with Inspired Antitumor Immunity

Yamin Zhang,<sup>#, a</sup> Biling Jiang,<sup>#, a</sup> Chen Guo,<sup>#, b</sup> Liping Liu,<sup>b</sup> Jian Xu,<sup>c</sup> Yujue Wang,<sup>a</sup> Chen Shen,<sup>a</sup> Jinjin Zhu,<sup>a</sup> Guanxin Shen,<sup>d</sup> Hao Jiang,<sup>\*,b</sup> Jintao Zhu,<sup>b</sup> and Juan Tao<sup>\*,a</sup>

<sup>a</sup> Department of Dermatology, Union Hospital, Tongji Medical College, Huazhong University of Science and Technology (HUST), Wuhan 430022, China

<sup>b</sup> Key Laboratory of Material Chemistry for Energy Conversion and Storage, Ministry of Education, School of Chemistry and Chemical Engineering, HUST, Wuhan 430074, China

<sup>c</sup> Department of Hematology, Union Hospital, Tongji Medical College, HUST, Wuhan 430022, China

<sup>d</sup> Department of Immunology, Tongji Medical College, HUST, Wuhan 430022, China

<sup>#</sup> These authors contributed equally to this work

<sup>\*</sup> Corresponding authors. *E-mail*: hustjh@hust.edu.cn (H. Jiang) and tjhappy@126.com (J. Tao.)

## Contents

**Fig. S1** The BET assay of pore size and specific surface area of AuNR@mSiO<sub>2</sub>.

**Fig. S2** The photothermal conversion efficiency of AuNR@mSiO<sub>2</sub>-Cu<sub>x</sub>S-PEG, AuNR@mSiO<sub>2</sub> and Cu<sub>x</sub>S NPs.

**Fig. S3** Cell viability of B16/F10 melanoma cells treated with AuNR@mSiO<sub>2</sub>-Cu<sub>x</sub>S-PEG with or without laser irradiation.

**Fig. S4** The photographs of the in-situ tumors collected at the end of experiments.

**Fig. S5** Body weight changes of tumor-bearing mice during experiments.

**Supplementary Figures:**

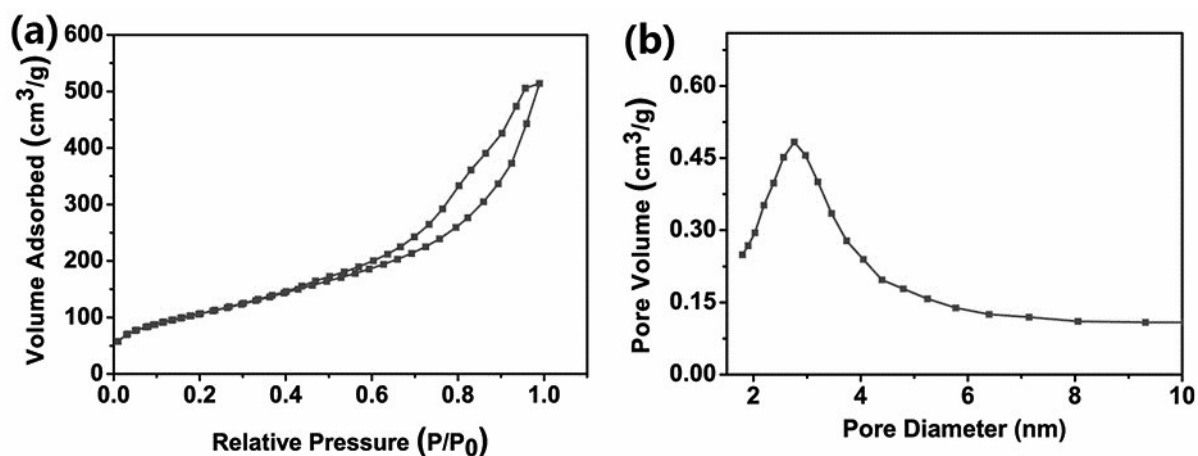

**Fig. S1** The BET assay of pore size and specific surface area of AuNR@mSiO<sub>2</sub>. (a) Nitrogen adsorption isotherms of AuNR@mSiO<sub>2</sub> and (b) the corresponding pore size distribution obtained from adsorption branch of AuNR@mSiO<sub>2</sub>.

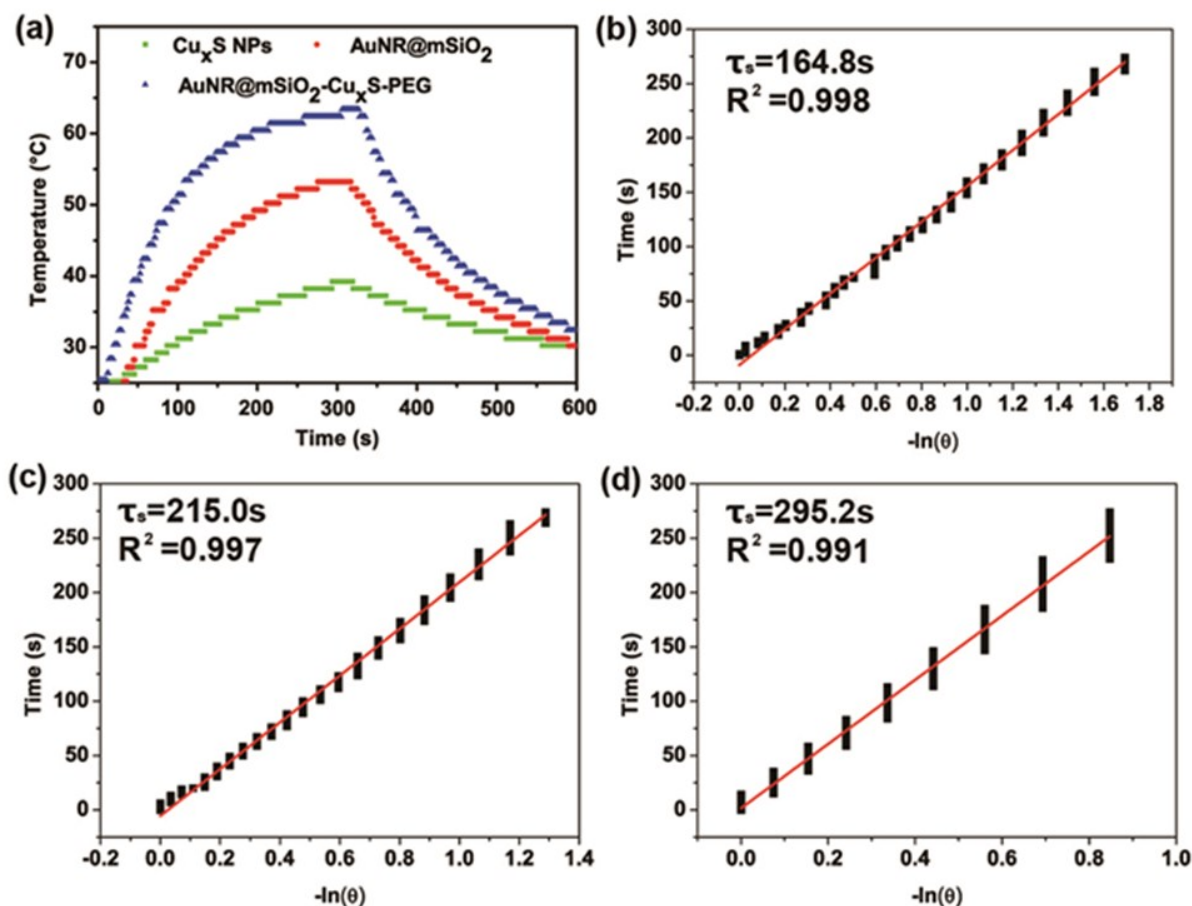

**Fig. S2** The photothermal conversion efficiency of  $\text{AuNR@mSiO}_2\text{-Cu}_x\text{S-PEG}$ ,  $\text{AuNR@mSiO}_2$  and  $\text{Cu}_x\text{S}$  NPs. (a) The temperature elevation of nanocomposites aqueous solutions irradiated with  $1.0\text{ W/cm}^2$  NIR for 5 min and turned off for 5 min. (b-d) Linear time data versus  $-\ln\theta$  obtained from the cooling period of the aqueous solution containing (b)  $\text{AuNR@mSiO}_2\text{-Cu}_x\text{S-PEG}$  nanocomposites (containing  $0.1\text{ mg/mL}$   $\text{Cu}_x\text{S}$  NPs and  $0.05\text{ mg/mL}$   $\text{AuNR@mSiO}_2$ ), (c)  $\text{AuNR@mSiO}_2$  ( $0.05\text{ mg/mL}$ ) and (d)  $\text{Cu}_x\text{S}$  NPs ( $0.1\text{ mg/mL}$ ), respectively. The photothermal conversion efficiency calculated is 69.7 %, 36.8 % and 14.5 %, respectively.

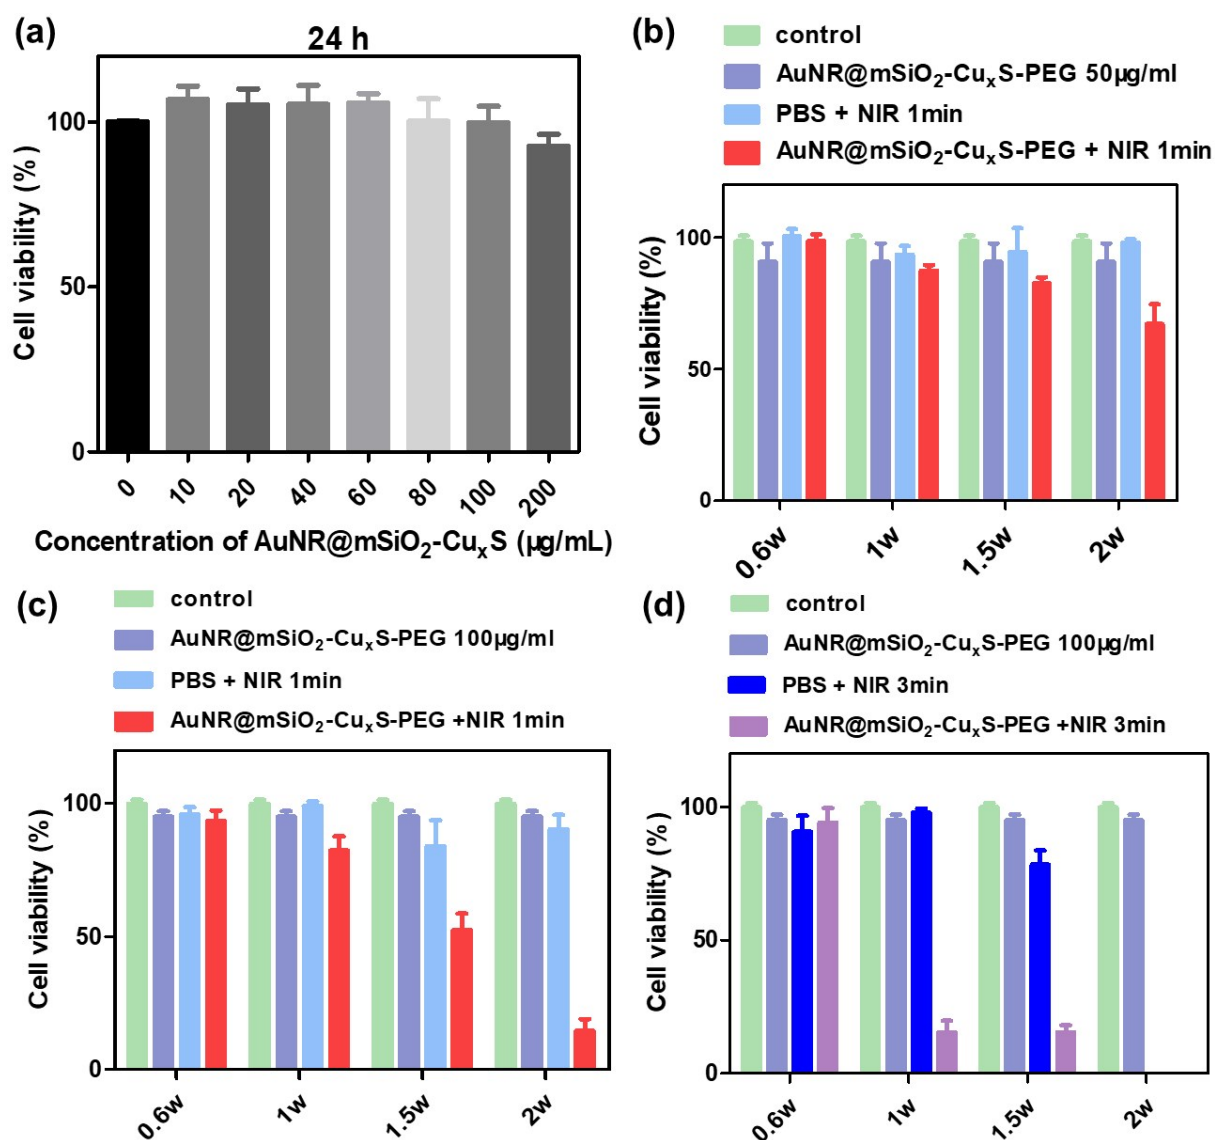

**Fig. S3** Cell viability of B16/F10 melanoma cells treated with various concentrations of AuNR@mSiO<sub>2</sub>-Cu<sub>x</sub>S-PEG with or without laser irradiation. (a) Cell viability of B16/F10 cells treated with AuNR@mSiO<sub>2</sub>-Cu<sub>x</sub>S-PEG with various concentrations for 24 h. (b-d) The B16/F10 melanoma cells were treated with AuNR@mSiO<sub>2</sub>-Cu<sub>x</sub>S-PEG at concentration of 50 and 100 µg/mL as indicated for 24 h. After that, the cells were irradiated by a 808 nm laser with varying time and power densities.

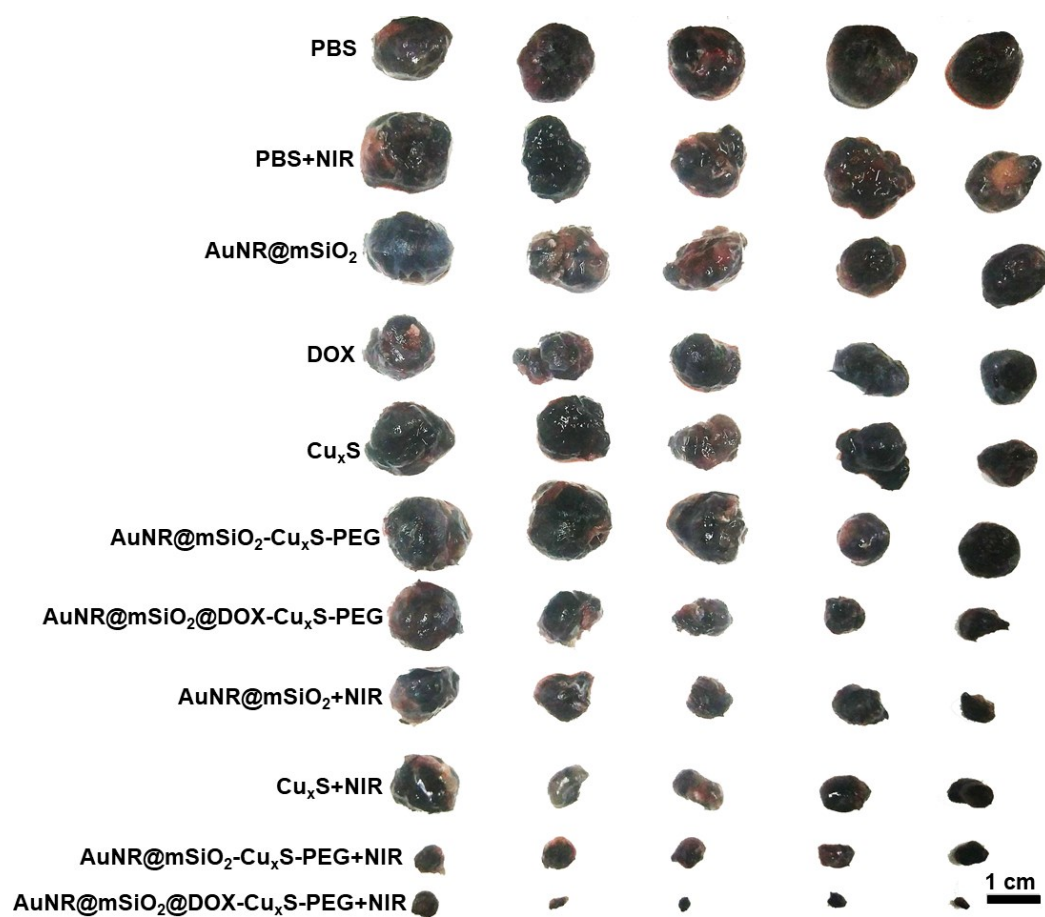

**Fig. S4** *In-situ* subcutaneous melanoma mice model was constructed as indicated. The photographs of the in-situ tumors collected at the end of experiment (n = 5).

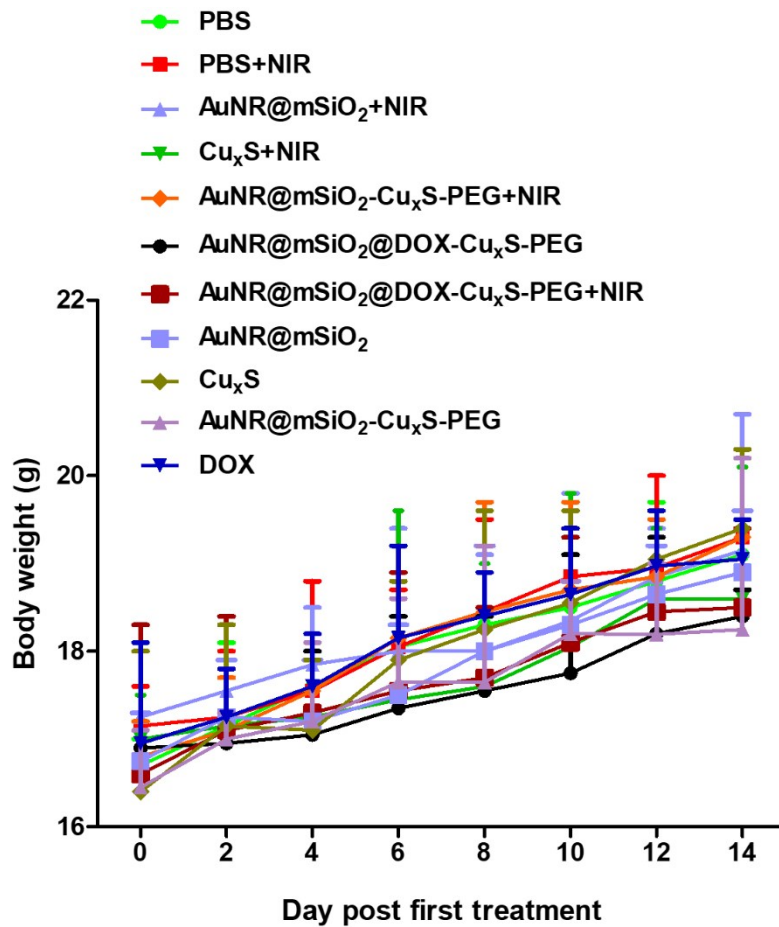

**Fig. S5** Body weight of tumor-bearing mice receiving treatments as indicated. Data were presented as mean  $\pm$  SD ( $n = 5$ ).
